# Supplementary material
Source: publisher figshare collection journal article supplement (https://acs.figshare.com/ndownloader/files/25179289)
Supplement: Supplementary file 1 [file 25179289]

## Supporting Information

# Reconfigurable Multi-State Optical Systems Enabled by VO<sub>2</sub> Phase Transitions

*Xiaoyang Duan,<sup>1</sup> Samuel T. White,<sup>2</sup> Yuanyuan Cui,<sup>3</sup> Frank Neubrech,<sup>1</sup> Yanfeng Gao,<sup>3,\*</sup>  
Richard F. Haglund,<sup>2,4,\*</sup> Na Liu<sup>5,6,\*</sup>*

<sup>1</sup>Max Planck Institute for Intelligent Systems, Heisenbergstrasse 3, 70569 Stuttgart, Germany

<sup>2</sup>Department of Physics and Astronomy, Vanderbilt University, Nashville, TN 37212, USA.

<sup>3</sup>School of Materials Science and Engineering, Shanghai University, Shanghai 200444, China.

<sup>4</sup>Interdisciplinary Materials Science Program, Vanderbilt University, Nashville, TN 37212, USA.

<sup>5</sup>2<sup>nd</sup> Physics Institute, University of Stuttgart, Pfaffenwaldring 57, 70569 Stuttgart, Germany

<sup>6</sup>Max Planck Institute for Solid State Research, Heisenbergstrasse 1, 70569 Stuttgart, Germany

\*E-mail: na.liu@pi2.uni-stuttgart.de, richard.haglund@vanderbilt.edu, yfgao@shu.edu.cn.

Including:

Pages S1 – S10

Figures S1 – S12

Movie S1

Hydrogenation and dehydrogenation dynamics of VO<sub>2</sub>

Sample fabrications

Hydrogenation/dehydrogenation

Optical characterizations

Numerical simulations

First-principle calculations

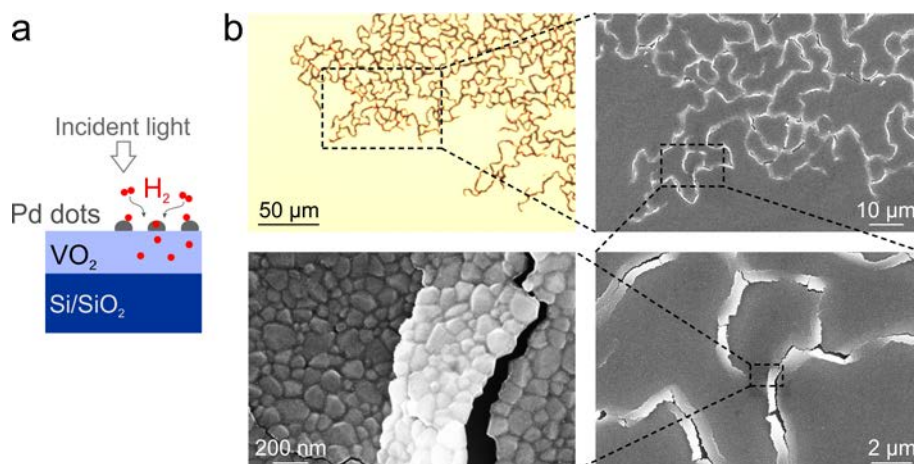

**Figure S1** | **a**, Schematic of the VO<sub>2</sub> (60 nm)/silicon substrate. **b**, Optical and SEM images of the sample after hydrogenation for 1 hour at 100 °C. The film shows clear damage to the VO<sub>2</sub> film due to lattice expansion with increasing H content.

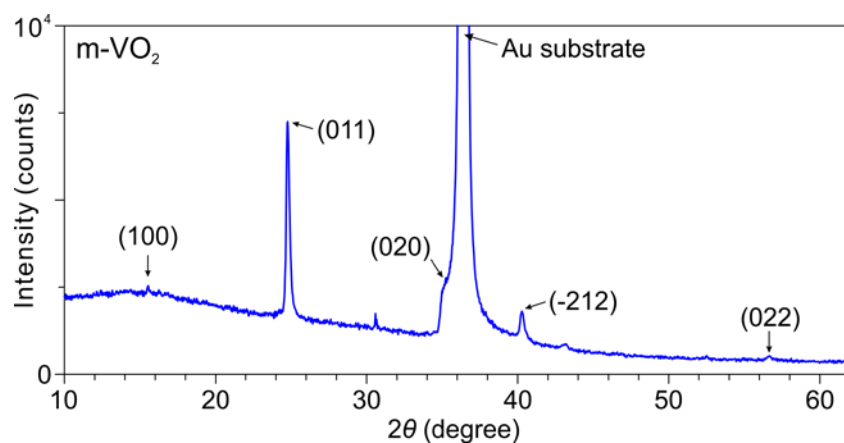

**Figure S2** | X-ray diffraction of the as-prepared m-VO<sub>2</sub> film deposited on Au (100 nm)/Si substrate measured at room temperature under ambient condition. The strongest peak appears at  $2\theta = 27.6^\circ$ , corresponding to the (011) planes of m-VO<sub>2</sub>. This shows the preferred growth orientation of VO<sub>2</sub> on the gold substrate, consistent with previous studies.<sup>1</sup>

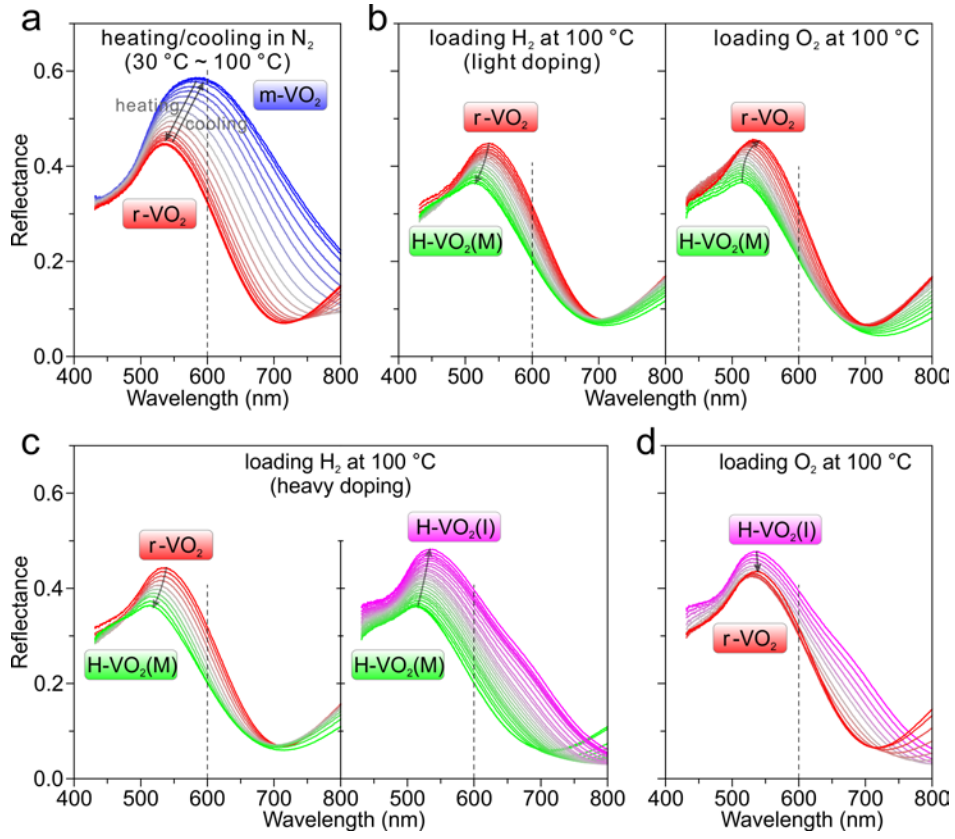

**Figure S3** | Evolution of measured reflectance spectra of the VO<sub>2</sub> sample in four different states. Reflectance at 600 nm (highlighted by the black-dashed lines) is tracked to indicate the phase transition paths. **a**, IMT between the m-VO<sub>2</sub> and r-VO<sub>2</sub> states through temperature tuning. **b**, Light hydrogenation from r-VO<sub>2</sub> to H-VO<sub>2</sub>(M), and subsequent dehydrogenation from H-VO<sub>2</sub>(M) to r-VO<sub>2</sub>. **c**, Heavy hydrogenation from r-VO<sub>2</sub> to H-VO<sub>2</sub>(I) via H-VO<sub>2</sub>(M). **d**, Dehydrogenation from H-VO<sub>2</sub>(I) to r-VO<sub>2</sub>, by completely skipping H-VO<sub>2</sub>(M).

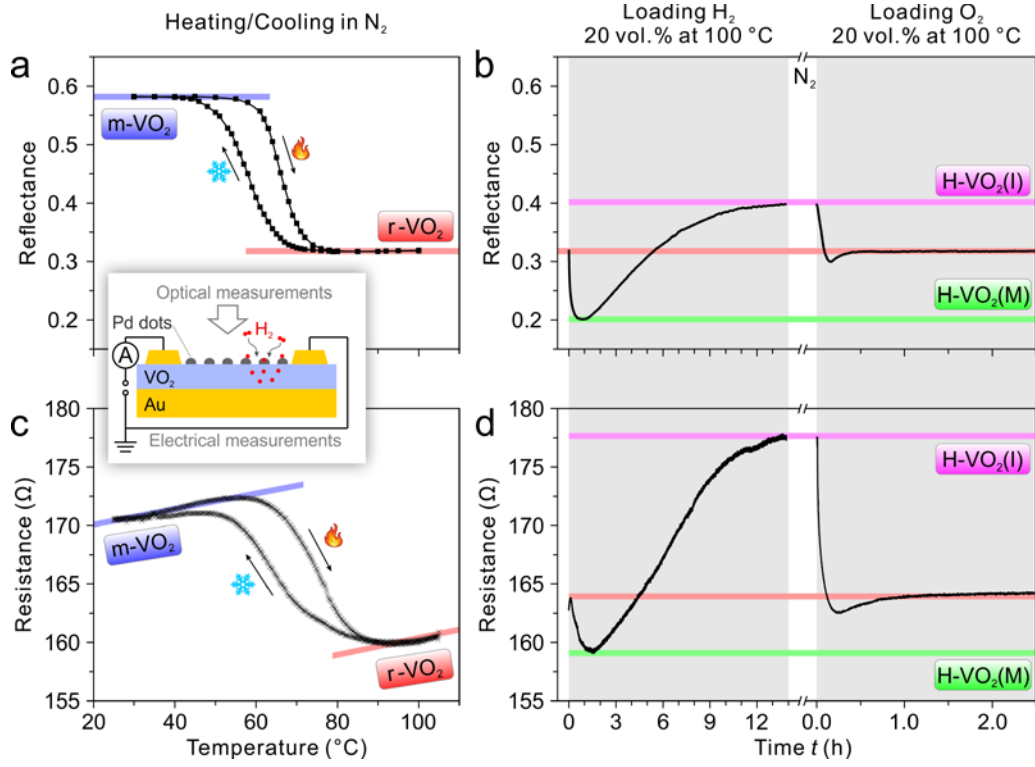

**Figure S4** | *In situ* optical (a,b) and electrical (c,d) measurements of the VO<sub>2</sub> sample. Inset: schematic of the measurement configuration. The applied voltage was kept at  $50.00 \pm 0.01$  mV.

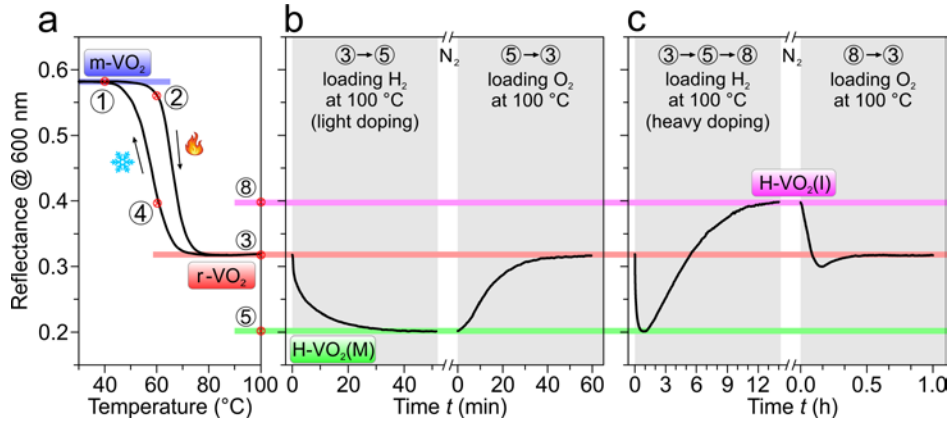

**Figure S5** | *In situ* reflectance spectroscopy during hydrogen loading and unloading at 100 °C. The temperature-dependent hysteresis curves from Fig. 1c of the main text are replotted in (a) for a direct comparison. At different gas loading times, VO<sub>2</sub> is (b) lightly hydrogenated to H-VO<sub>2</sub>(M), following the path ‘③→⑤’, and (c) heavily hydrogenated to H-VO<sub>2</sub>(I), following the path ‘③→⑤→⑧’.

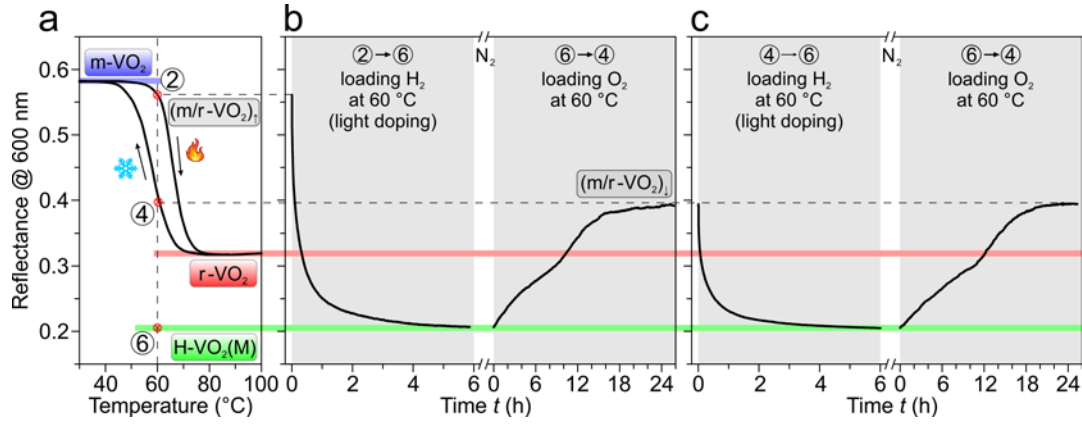

**Figure S6** | *In situ* reflectance during hydrogen loading and unloading at 60 °C. H-doping of the (b)  $(m/r\text{-VO}_2)_I$  state ('②') or the (c)  $(m/r\text{-VO}_2)_I$  state ('④') results in the formation of  $\text{H-VO}_2(\text{M})$ . Upon  $\text{O}_2$  exposure, state '④' is restored.

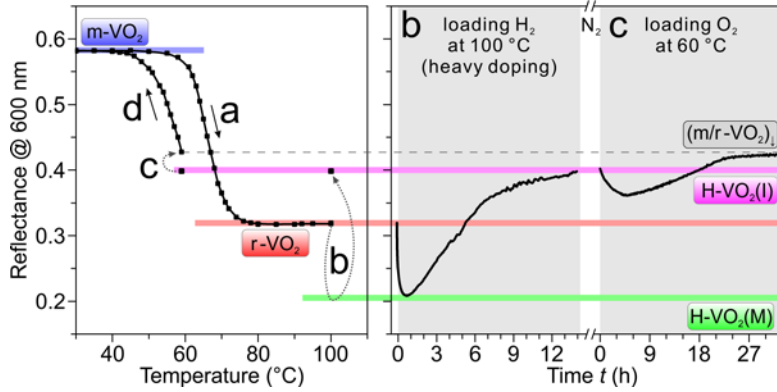

**Figure S7** | Dehydrogenation of  $\text{H-VO}_2(\text{I})$  at 60 °C. **a**, With increasing the temperature from 30 °C to 100 °C stepwise in pure  $\text{N}_2$ , the IMT from  $m\text{-VO}_2$  to  $r\text{-VO}_2$  is visualized. **b**, Loading  $\text{H}_2$  gas at 100 °C. The sample is lightly hydrogenated to  $\text{H-VO}_2(\text{M})$  first, and then heavily hydrogenated to  $\text{H-VO}_2(\text{I})$ . When the sample reaches  $\text{H-VO}_2(\text{I})$  completely, the temperature is decreased to 60 °C. **c**, Loading  $\text{O}_2$  gas at 60 °C. First, the reflectance decreases. It indicates that dehydrogenation starts. Then, the reflectance increases and is stabilized at the  $(m/r\text{-VO}_2)_I$  state (gray-dashed line). **d**, Decreasing the temperature to 30 °C in pure  $\text{N}_2$ . The reflectance is restored to  $m\text{-VO}_2$  along the hysteresis curve.

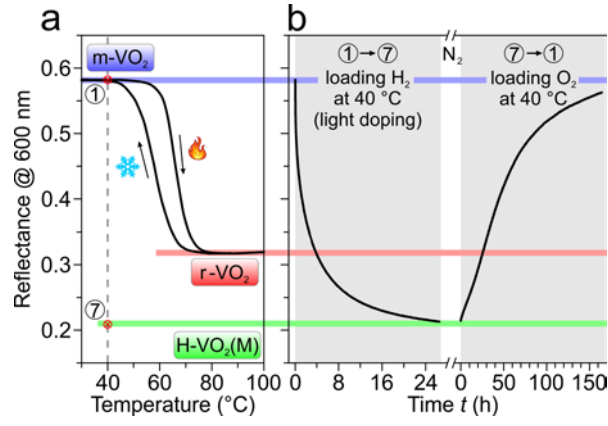

**Figure S8** | *In situ* reflectance during hydrogen loading and unloading at 40 °C.

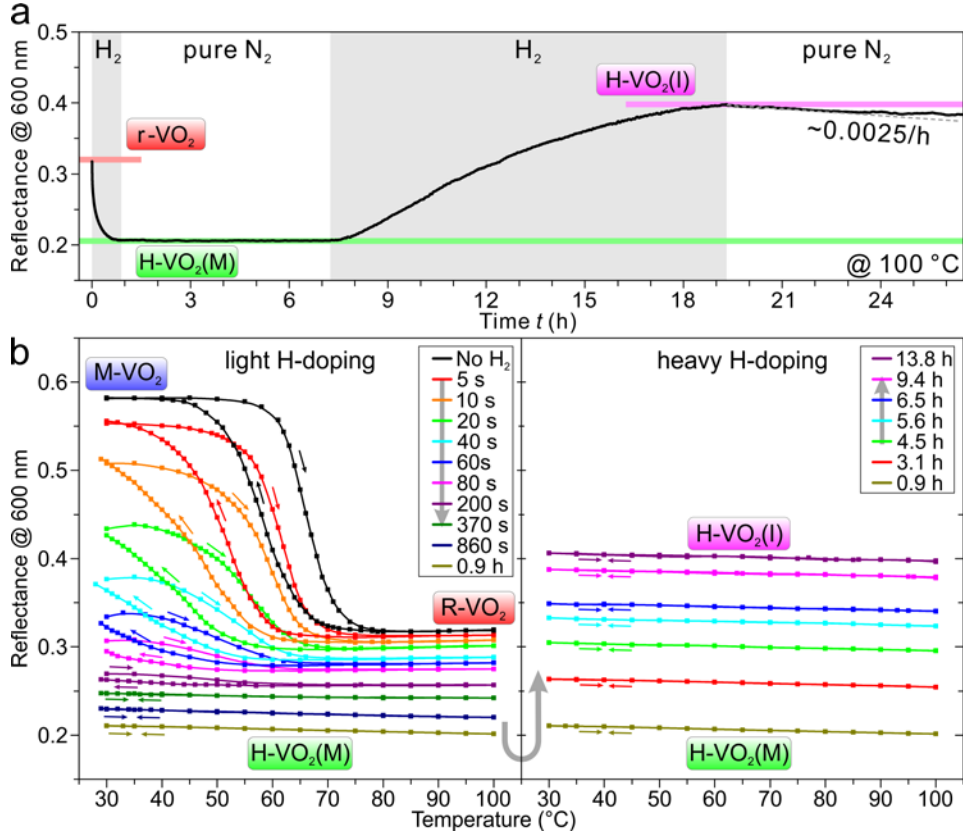

**Figure S9** | **a**, H-VO<sub>2</sub>(M) and H-VO<sub>2</sub>(I) can be maintained by switching off H<sub>2</sub> for several hours at 100°C. They are quite stable in pure N<sub>2</sub> even at high temperatures. **b**, Hysteresis of the VO<sub>2</sub> IMT in dependence on hydrogen loading time *t*. After hydrogen exposure at 100 °C for a certain time *t*, the hysteresis of the H-VO<sub>2</sub> is carried out by temperature tuning in pure nitrogen.

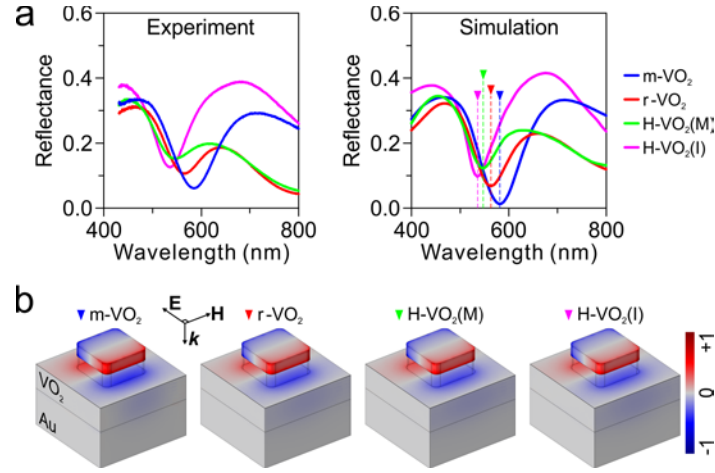

**Figure S10** | **a**, Experimental and simulated reflectance spectra of the colour square with  $D = 118$  nm and  $g = 100$  nm at the four different states. **b**, Simulated surface charge distributions at resonance at the four different states.

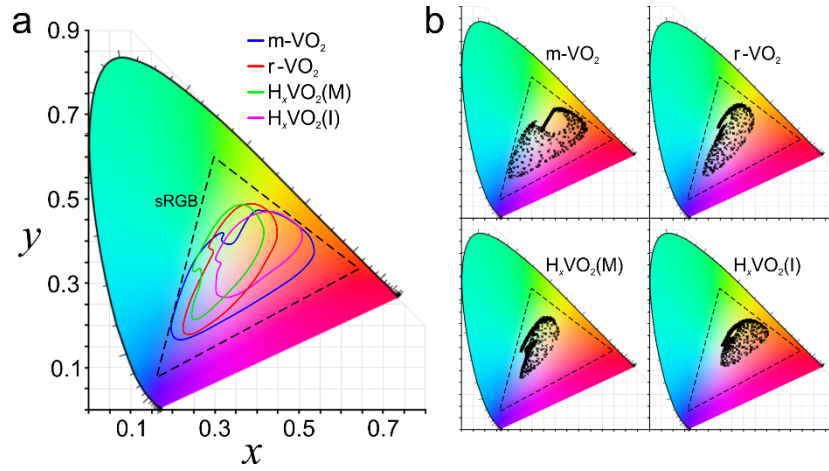

**Figure S11** | **a**, Colour range of the palette from Fig. 2c in the main text at the four states. The black triangle indicates the standard RGB color (sRGB) range. **b**, CIE 1931 chromaticity diagram overlaid with all the colours from the palette. The CIE illuminant D65 is used for the conversion to the chromaticity coordinate. Each black cross in the CIE map indicates a colour square from the palette.

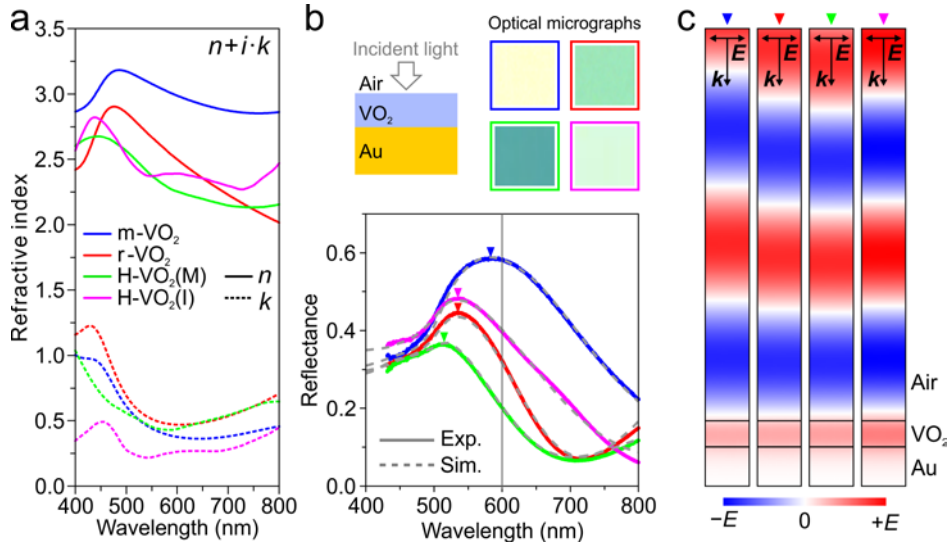

**Figure S12** | **a**, Refractive index ( $n + i \cdot k$ ) of the VO<sub>2</sub> at four different phases. The data is from the combination of spectroscopic ellipsometry and reflectance measurements. **b**, Experimental (coloured solid lines) and simulated (gray-dotted lines) reflectance spectra, and the corresponding optical micrographs ( $10 \times 10 \mu\text{m}^2$ ) of the VO<sub>2</sub> film at four different phases. **c**, The corresponding electric field distributions at the reflectance peaks in **b** (indicated by arrows). Here, a linearly polarized TEM beam is normally incident on the VO<sub>2</sub> surface.

## Movie S1

(Gogh, Vincent van (1853-1890): *The Starry Night*, 1889. New York, Museum of Modern Art (MoMA). Oil on canvas,  $29 \times 36$  OE ( $73.7 \times 92.1$  cm). Acquired through the Lillie P. Bliss Bequest. Acc. no.: 472.1941. © 2020. Digital image, The Museum of Modern Art, New York/Scala, Florence.)



## Hydrogenation and dehydrogenation dynamics of VO<sub>2</sub>.

### 1. High temperatures ( $T > T_c$ )

At high temperature (100 °C) as shown in Figure S5a, for light H-doping  $R_{600}$  first decreases and then approaches a constant at  $R_{600} = 0.20$  (green line) in approximately 40 min. During dehydrogenation by oxygen exposure, the initial r-VO<sub>2</sub> state is restored ( $R_{600} = 0.32$ ). To verify the dehydrogenated state of r-VO<sub>2</sub>, the sample is cooled down to 30 °C in nitrogen.  $R_{600}$  returns to 0.58 along the path ‘③→④→①’ as shown in Figure S5a.

To explore further hydrogenation (heavy H-doping), the VO<sub>2</sub> sample is reset to r-VO<sub>2</sub> at 100 °C and loaded with hydrogen until saturation. As shown in Figure S5c,  $R_{600}$  decreases rapidly and reaches the H-VO<sub>2</sub>(M) state within 40 min as known from light H-doping (Figure S5b). Then,  $R_{600}$  increases slowly and eventually approaches 0.40 (magenta line) in 14 hours, indicating the H-VO<sub>2</sub>(I) phase has achieved (corresponding to the path ‘③→⑤→⑧’). Upon oxygen exposure,  $R_{600} = 0.40$  returns to 0.32 in 30 min and r-VO<sub>2</sub> is formed again (path ‘⑧→③’). The dehydrogenation process is asymmetric to the hydrogenation process and consistent with previous studies.<sup>2</sup>

### 2. Intermediate temperatures ( $T \approx T_c$ )

(De)hydrogenation at temperatures close to  $T_c$  shows a more complex behaviour. The temperature is kept at 60 °C (two states, ‘②’ and ‘④’ in Figure S6a). Upon hydrogen loading,  $R_{600}$  of both the (m/r-VO<sub>2</sub>)<sub>↑</sub> and (m/r-VO<sub>2</sub>)<sub>↓</sub> initial states decreases rapidly, and then approaches the H-VO<sub>2</sub>(M) phase in 6 hours. As dehydrogenation starts upon oxygen exposure, the reflectance increases gradually and approaches the (m/r-VO<sub>2</sub>)<sub>↓</sub> state eventually. Similar to the high temperature regime, heavy hydrogenation resulting in the H-VO<sub>2</sub>(I) phase can also be achieved. In a subsequent dehydrogenation of VO<sub>2</sub> at 60 °C, H-VO<sub>2</sub>(I) returns to (m/r-VO<sub>2</sub>)<sub>↓</sub> directly, which is again asymmetric to the hydrogenation process (see Figure S7).

### 3. Low temperatures ( $T < T_c$ )

For (de)hydrogenation of VO<sub>2</sub> at low temperature (40 °C), upon hydrogen loading,  $R_{600}$  (blue line in Figure S8) approaches 0.2 after ~30 hours, corresponding light hydrogenation from m-VO<sub>2</sub> to H-VO<sub>2</sub>(M) along the path ‘①→⑦’. Upon oxygen exposure,  $R_{600}$  reaches 0.58 and the initial m-VO<sub>2</sub> state is restored after ~170 hours.

## Experimental Section

*VO<sub>2</sub> film preparation:* VO<sub>2</sub> films (60 nm) were deposited by radio frequency (RF) magnetron sputtering on Au (100 nm)/silicon substrates, in an Angstrom Amod system containing a two-inch diameter vanadium metal target (99.9%). The pressure during the deposition was kept at 6 mTorr (20 sccm Ar and 1 sccm O<sub>2</sub>), and the substrates were maintained at room temperature.<sup>3</sup> After deposition, the samples were annealed in a tube furnace under 250 mTorr O<sub>2</sub> (adjusted by flow rate, ~17 sccm) at 450 °C for 10 min.

*Hydrogenation and dehydrogenation:* Nano-sized Pd dots were formed on the VO<sub>2</sub> films by electron-beam evaporation of Pd (0.5 nm) and subsequent thermal annealing (200 °C in N<sub>2</sub> for 30 min) to achieve hydrogenation at ambient temperatures. Hydrogenation and dehydrogenation were carried out in a laboratory-built gas chamber with a temperature controller (rate 0.1 °C/s, range 20 °C – 120 °C, accuracy  $\pm 0.1$  °C). The flow rates of the gases (20 vol.% H<sub>2</sub> in N<sub>2</sub> or 20 vol.% O<sub>2</sub> in N<sub>2</sub>) were 1.0 L min<sup>-1</sup>.

*Nanostructure fabrication:* The samples were manufactured using electron-beam lithography (EBL). First, a double-layer of PMMA resist (250k-2.5% and 950k-1.5%, Allresist) was spin-coated (5 s at 3000 r.p.m and 30 s at 8000 r.p.m.) on a VO<sub>2</sub> substrate, followed by baking (4 min at 150 °C) on a hotplate in air. EBL (Raith eLine Plus) was performed with 20 kV acceleration voltage, 20  $\mu$ m aperture, 130 pA current, and 500  $\mu$ C cm<sup>-2</sup> dose. After development (90 s in MIBK and 60 s in isopropanol), 30 nm Al<sub>2</sub>O<sub>3</sub> and 30 nm Al layers were successively deposited on the substrate using electron-beam evaporation (PFEIFFER Vacuum, PLS-500), followed by a lift-off process in acetone at room temperature for 6 hours. To stabilize the samples, baking at 120 °C was carried out in air for 1 hour after fabrication.

*Optical measurements:* The optical images and reflectance spectra were measured using a NT&C bright-field reflection microscopy setup with a white light source (Energetiq EQ-99). A digital CCD camera (Allied-Vision Prosilica GT2450C) was used to capture the colour micrographs with a 20  $\times$  objective (NA = 0.4). The measured reflectance spectra were normalized with respect to that of an Al mirror.

*Numerical simulations:* Numerical simulations were carried out using COMSOL Multiphysics software based on a finite-element method. Periodic boundary conditions and waveguide port boundary conditions were used in the simulations. The dielectric constants of Au, Al, and Al<sub>2</sub>O<sub>3</sub> were taken from Palik.<sup>4</sup> The refractive indices of VO<sub>2</sub> at the four different phases are shown in Figure S12.

*First-principles calculations:* The first-principle calculations were performed by using the Vienna *ab initio* simulation package (VASP) code.<sup>5</sup> The exchange and correlation terms were

described using general gradient approximation (GGA) in the scheme of Perdew-Burke-Ernzerhof (PBE).<sup>6</sup> Considering the V-3d orbitals, the Hubbard on-site repulsion  $U$  was applied with the PBE functional to treat the strong-correlation effects.<sup>7</sup> The effective value ( $U_{\text{eff}} = U - J$ ) of the on-site Coulomb and exchange strength was 3.4 eV.<sup>8</sup> The valence electron configurations for V, O, Cr and Pt were considered as 3d<sup>3</sup>4s<sup>2</sup>, 2s<sup>2</sup>2p<sup>4</sup>, 3d<sup>5</sup>4s<sup>1</sup> and 5d<sup>9</sup>6s<sup>1</sup>, respectively. The energy cutoff for the plane-wave was set to 520 eV. The slab model methods were used to model the VO<sub>2</sub> surface and metal-VO<sub>2</sub> interface, and the  $4 \times 4 \times 1$  Monkhorst-Pack  $k$ -point mesh was used. For calculations of the electronic density of states,  $8 \times 6 \times 2$   $k$ -point mesh was used. This set of parameters were used to ensure that the total energies converged to 10<sup>-5</sup> eV/unit cell. The Hellmann-Feynman forces were converged to less than 0.01 eV/Å.

- (1) Appavoo, K.; Lei, D. Y.; Sonnefraud, Y.; Wang, B.; Pantelides, S. T.; Maier, S. A.; Haglund, R. F., Jr. *Nano Lett.* **2012**, 12, 780–786.
- (2) Yoon, H.; Choi, M.; Lim, T.-W.; Kwon, H.; Ihm, K.; Kim, J. K.; Choi, S.-Y.; Son, J. *Nat. Mater.* **2016**, 15, 1113–1119.
- (3) Marvel, R. E.; Harl, R. R.; Craciun, V.; Rogers, B. R.; Haglund, R. F., Jr. *Acta Mater.* **2015**, 91, 217–226.
- (4) Palik, E. D., *Handbook of optical constants of solids*. Academic Press: New York, 1998.
- (5) Kresse, G.; Joubert, D. *Phys. Rev. B* **1999**, 59, 1758–1775.
- (6) Perdew, J. P.; Burke, K.; Ernzerhof, M. *Phys. Rev. Lett.* **1996**, 77, 3865–3868.
- (7) Wang, L.; Maxisch, T.; Ceder, G. *Phys. Rev. B* **2006**, 73, 195107.
- (8) Zhang, J.; He, H.; Xie, Y.; Pan, B. *Phys. Chem. Chem. Phys.* **2013**, 15, 4687–4090.
